# Supplementary material for: Socioeconomic and Cultural Correlates of Diet Quality in the Canadian Arctic: Results from the 2007–2008 Inuit Health Survey
Source: Atypon-hosted journal article supplement (doi:10.3148/cjdpr-2015-006), 2015-05-21
Supplement: cjdpr-2015-006suppl.pdf [file cjdpr-2015-006suppl.pdf]

Supplemental Table 1: Mean ( $\pm$ sd) and median (95% confidence intervals) values for **males** of selected measures of energy intake by socioeconomic and cultural characteristics and region of residence; *p*-values based on t-tests or Anova for differences in mean intakes and Wilcoxon tests for non-normal data.

| <i>Variable</i>       | <i>Energy kJ/day</i> <sup>‡</sup> | <i>Energy Intake:BMR</i> <sup>Ⓔ</sup> | <i>% Energy from protein</i> <sup>‡</sup> | <i>% Energy from fat</i> | <i>% Energy from carbohydrates</i> <sup>‡</sup> | <i>% Energy from saturated fats</i> | <i>% Energy from high-sugar beverages</i> <sup>§</sup> |
|-----------------------|-----------------------------------|---------------------------------------|-------------------------------------------|--------------------------|-------------------------------------------------|-------------------------------------|--------------------------------------------------------|
| <i>Age (years)</i>    |                                   |                                       |                                           |                          |                                                 |                                     |                                                        |
| 19-30                 | 10409** (6225,13270)              | 1.41** (0.82,1.96)                    | 15.5** (9.8,21.5)                         | 29.7* ( $\pm$ 11.3)      | 51.4** ( $\pm$ 16.9)                            | 9.2** (7.11,12.48)                  | 15.6** ( $\pm$ 15.1)                                   |
| 31-50                 | 9677** (6331,13416)               | 1.31** (0.91,1.79)                    | 20.0** (13.6,27.6)                        | 31.8* ( $\pm$ 11.8)      | 45.1** ( $\pm$ 17.2)                            | 10.1** (7.64,13.22)                 | 8.6** ( $\pm$ 10.4)                                    |
| 51+                   | 7390** (4932,10147)               | 1.11** (0.73,1.46)                    | 27.6** (18.8,38.7)                        | 32.9* ( $\pm$ 12.3)      | 36.2** ( $\pm$ 15.5)                            | 10.5** (7.84,13.71)                 | 3.8** ( $\pm$ 6.38)                                    |
| <i>Education</i>      |                                   |                                       |                                           |                          |                                                 |                                     |                                                        |
| Low <sup>1</sup>      | 7951** (5047,11031)               | 1.19 (0.78,1.60)                      | 24.4** (15.6,34.7)                        | 33.7* ( $\pm$ 13.6)      | 38.0* ( $\pm$ 17.6)                             | 10.1 (7.52,13.30)                   | 6.1** ( $\pm$ 9.05)                                    |
| High <sup>2</sup>     | 9611** (6312,13276)               | 1.30 (0.88,1.79)                      | 19.5** (13.0,27.4)                        | 31.1* ( $\pm$ 11.1)      | 46.3* ( $\pm$ 17.0)                             | 10.0 (7.77,13.12)                   | 10.1** ( $\pm$ 12.7)                                   |
| <i>Income</i>         |                                   |                                       |                                           |                          |                                                 |                                     |                                                        |
| < \$40,000            | 8817* (5723,12325)                | 1.25 (0.80,1.73)                      | 21.0 (13.5,29.7)                          | 31.6 ( $\pm$ 12.0)       | 44.5 ( $\pm$ 18.1)                              | 9.9 (7.67,13.01)                    | 9.3* ( $\pm$ 12.8)                                     |
| $\geq$ \$40,000       | 9870* (7095,13191)                | 1.29 (0.91,1.73)                      | 20.4 (13.7,27.4)                          | 31.8 ( $\pm$ 10.7)       | 44.1 ( $\pm$ 15.6)                              | 10.2 (7.77,13.33)                   | 8.8* ( $\pm$ 10.3)                                     |
| <i>Employment</i>     |                                   |                                       |                                           |                          |                                                 |                                     |                                                        |
| Employed <sup>3</sup> | 9570* (6386,13098)                | 1.28 (0.87,1.73)                      | 19.6** (13.0,27.7)                        | 31.6 ( $\pm$ 11.2)       | 45.2 ( $\pm$ 16.0)                              | 10.1 (7.73,13.24)                   | 9.5** ( $\pm$ 11.2)                                    |
| Other                 | 8748* (5669,11921)                | 1.26 (0.80,1.69)                      | 21.8** (14.7,31.1)                        | 32.2 ( $\pm$ 12.2)       | 42.8 ( $\pm$ 18.2)                              | 10.1 (7.80,13.21)                   | 8.1** ( $\pm$ 11.9)                                    |
| <i>Language</i>       |                                   |                                       |                                           |                          |                                                 |                                     |                                                        |
| Inuit <sup>4</sup>    | 8243* (5127,11988)                | 1.19 (0.74,1.70)                      | 22.3 (13.9,30.6)                          | 33.3 ( $\pm$ 13.6)       | 40.4** ( $\pm$ 19.2)                            | 10.1 (7.65,13.20)                   | 7.4 ( $\pm$ 9.51)                                      |
| Other                 | 9706* (6303,13270)                | 1.30 (0.85,1.79)                      | 20.4 (14.2,27.4)                          | 32.0 ( $\pm$ 10.3)       | 44.8** ( $\pm$ 15.0)                            | 10.5 (8.14,13.54)                   | 8.6 ( $\pm$ 13.3)                                      |
| <i>TF consumption</i> |                                   |                                       |                                           |                          |                                                 |                                     |                                                        |
| Yes <sup>5</sup>      | 9403 (6203,13015)                 | 1.32* (0.86,1.79)                     | 26.7** (18.9,35.4)                        | 31.7 ( $\pm$ 11.8)       | 38.4** ( $\pm$ 15.7)                            | 9.7* (7.37,12.51)                   | 7.6** ( $\pm$ 10.6)                                    |
| No                    | 8798 (5755,12141)                 | 1.20* (0.78,1.67)                     | 13.9** (9.9,18.7)                         | 31.8 ( $\pm$ 12.0)       | 51.9** ( $\pm$ 17.0)                            | 10.4* (8.40,13.49)                  | 11.1** ( $\pm$ 13.4)                                   |

\*significantly different between groups,  $p < .05$ ; \*\*significantly different between groups,  $p < .01$ ; †significantly different between sexes,  $p < .05$ ; ‡significantly different between sexes,  $p < .01$ ; §Transformed nutrients presented as geometric means (interquartile ranges); <sup>1</sup>participants report educational attainment lower than secondary school completion; <sup>2</sup>participants report educational attainment as secondary school completion or higher; <sup>3</sup>full- or part-time employment at the time of survey; <sup>4</sup>predominant language spoken at home is an Inuit language or dialect; <sup>5</sup>TF = traditional food, participants report having consumed TF in the 24-hours prior to survey; <sup>6</sup>BMR = basal metabolic rate based on self-reported body weight, height, age and sex (15).

Supplemental Table 2: Mean ( $\pm$ sd) and median (95% confidence intervals) values for **females** of selected measures of energy intake by socioeconomic and cultural characteristics and region of residence; *p*-values based on t-tests or Anova for differences in mean intakes and Wilcoxon tests for non-normal data.

| <i>Variable</i>       | <i>Energy kJ/day</i> <sup>‡</sup> | <i>Energy Intake:BMR</i> <sup>6</sup> | <i>% Energy from protein</i> <sup>‡</sup> | <i>% Energy from fat</i> | <i>% Energy from carbohydrates</i> <sup>‡</sup> | <i>% Energy from saturated fats</i> | <i>% Energy from high-sugar beverages</i> <sup>§</sup> |
|-----------------------|-----------------------------------|---------------------------------------|-------------------------------------------|--------------------------|-------------------------------------------------|-------------------------------------|--------------------------------------------------------|
| <i>Age (years)</i>    |                                   |                                       |                                           |                          |                                                 |                                     |                                                        |
| 19-30                 | 8584** (5909,11519)               | 1.40** (0.92,1.94)                    | 15.7** (11.0,21.0)                        | 29.6** ( $\pm$ 10.7)     | 53.4** ( $\pm$ 14.8)                            | 9.5** (7.03,12.21)                  | 17.1** ( $\pm$ 14.5)                                   |
| 31-50                 | 7950** (5658,10381)               | 1.34** (0.94,1.73)                    | 17.5** (12.5,23.4)                        | 31.8** ( $\pm$ 11.4)     | 48.7** ( $\pm$ 15.6)                            | 9.9** (7.59,12.64)                  | 11.2** ( $\pm$ 13.0)                                   |
| 51+                   | 6817** (4645,8934)                | 1.20** (0.82,1.55)                    | 23.6** (15.9,31.6)                        | 32.4** ( $\pm$ 12.1)     | 41.2** ( $\pm$ 16.2)                            | 9.8** (7.26,12.52)                  | 4.7** ( $\pm$ 7.7)                                     |
| <i>Education</i>      |                                   |                                       |                                           |                          |                                                 |                                     |                                                        |
| Low <sup>1</sup>      | 6987** (4702,9504)                | 1.25* (0.86,1.68)                     | 20.8 (13.5,28.3)                          | 31.4 ( $\pm$ 12.6)       | 45.2** ( $\pm$ 18.0)                            | 9.3 (6.72,12.01)                    | 8.1** ( $\pm$ 11.5)                                    |
| High <sup>2</sup>     | 8127** (5803,10794)               | 1.35* (0.93,1.77)                     | 17.4 (12.3,23.4)                          | 31.2 ( $\pm$ 10.9)       | 49.5** ( $\pm$ 15.3)                            | 9.8 (7.44,12.70)                    | 12.7** ( $\pm$ 13.9)                                   |
| <i>Income</i>         |                                   |                                       |                                           |                          |                                                 |                                     |                                                        |
| < \$40,000            | 7789 (5277,10372)                 | 1.33 (0.90,1.79)                      | 18.2 (12.3,24.6)                          | 30.7* ( $\pm$ 11.3)      | 49.1* ( $\pm$ 16.3)                             | 9.5* (7.03,12.32)                   | 11.9 ( $\pm$ 13.5)                                     |
| $\geq$ \$40,000       | 8143 (5982,10476)                 | 1.29 (0.93,1.60)                      | 18.5 (13.1,24.2)                          | 32.4* ( $\pm$ 11.2)      | 46.7* ( $\pm$ 15.0)                             | 10.3* (7.90,13.23)                  | 9.4 ( $\pm$ 11.8)                                      |
| <i>Employment</i>     |                                   |                                       |                                           |                          |                                                 |                                     |                                                        |
| Employed <sup>3</sup> | 8052** (5636,10443)               | 1.32 (0.93,1.70)                      | 17.8* (12.7,23.4)                         | 31.7 ( $\pm$ 11.1)       | 48.8 ( $\pm$ 15.5)                              | 10.0* (7.59,12.79)                  | 11.4 ( $\pm$ 13.0)                                     |
| Other                 | 7372** (4997,9793)                | 1.29 (0.87,1.76)                      | 18.9* (12.4,26.1)                         | 31.1 ( $\pm$ 11.9)       | 47.6 ( $\pm$ 17.1)                              | 9.45* (6.97,12.10)                  | 11.3 ( $\pm$ 13.5)                                     |
| <i>Language</i>       |                                   |                                       |                                           |                          |                                                 |                                     |                                                        |
| Inuit <sup>4</sup>    | 7601 (5140,10424)                 | 1.33 (0.94,1.66)                      | 19.8** (13.0,26.3)                        | 30.5* ( $\pm$ 11.8)      | 47.3 ( $\pm$ 17.3)                              | 9.1** (7.98,13.29)                  | 10.1 ( $\pm$ 12.3)                                     |
| Other                 | 7996 (5940,10060)                 | 1.30 (0.94,1.66)                      | 17.6** (12.9,23.4)                        | 32.5* ( $\pm$ 10.7)      | 48.0 ( $\pm$ 14.2)                              | 10.3** (7.98,13.31)                 | 10.1 ( $\pm$ 12.7)                                     |
| <i>TF consumption</i> |                                   |                                       |                                           |                          |                                                 |                                     |                                                        |
| Yes <sup>5</sup>      | 8093** (5472,10929)               | 1.38** (0.93,1.84)                    | 22.5** (15.9,28.5)                        | 31.5 ( $\pm$ 12.2)       | 43.8** ( $\pm$ 16.2)                            | 9.4* (6.99,11.91)                   | 9.5** ( $\pm$ 12.0)                                    |
| No                    | 7446** (5372,9724)                | 1.24** (0.88,1.61)                    | 13.4** (10.0,17.2)                        | 31.0 ( $\pm$ 10.4)       | 54.2** ( $\pm$ 14.3)                            | 10.0* (7.70,13.09)                  | 13.9** ( $\pm$ 14.6)                                   |

\*significantly different between groups, *p* < .05; \*\*significantly different between groups, *p* < .01; †significantly different between sexes, *p* < .05; ‡significantly different between sexes, *p* < .01; §Transformed nutrients presented as geometric means (interquartile ranges); <sup>1</sup>participants report educational attainment lower than secondary school completion; <sup>2</sup>participants report educational attainment as secondary school completion or higher; <sup>3</sup>full- or part-time employment at the time of survey; <sup>4</sup>predominant language spoken at home is an Inuit language or dialect; <sup>5</sup>TF = traditional food, participants report having consumed TF in the 24-hours prior to survey; <sup>6</sup>BMR = basal metabolic rate based on self-reported body weight, height, age and sex (15).

Supplemental Table 3: Mean ( $\pm$ sd) and median (95% confidence intervals) values for **males** of selected diet quality indicators by socioeconomic and cultural characteristics and region of residence; *p*-values based on t-tests or Anova for differences in mean intakes and Wilcoxon tests for non-normal data.

| <i>Variable</i>       | <i>Fibre g</i>      | <i>Cholesterol mg‡</i> | <i>Na:K ratio‡</i> | <i>HEI score‡</i>    | <i>% Energy from TF‡§</i> |
|-----------------------|---------------------|------------------------|--------------------|----------------------|---------------------------|
| <i>Age (years)</i>    |                     |                        |                    |                      |                           |
| 19-30                 | 9.46** (4.65,16.11) | 307 (102,526)          | 1.03** (0.66,1.69) | 49.3 ( $\pm$ 10.5)   | 11.2** ( $\pm$ 17.3)      |
| 31-50                 | 7.98** (3.86,12.90) | 376 (187,619)          | 0.92** (0.60,1.43) | 49.6 ( $\pm$ 11.3)   | 17.8** ( $\pm$ 22.7)      |
| 51+                   | 5.19** (2.08,9.42)  | 359 (170,633)          | 0.79** (0.47,1.24) | 51.2 ( $\pm$ 12.1)   | 29.3** ( $\pm$ 26.2)      |
| <i>Education</i>      |                     |                        |                    |                      |                           |
| Low <sup>1</sup>      | 5.04** (1.80,2.96)  | 351 (179,634)          | 0.80** (0.48,1.21) | 48.7 ( $\pm$ 11.4)   | 28.7** ( $\pm$ 13.6)      |
| High <sup>2</sup>     | 8.39** (3.91,14.13) | 358 (167,606)          | 0.97** (0.60,1.54) | 50.2 ( $\pm$ 11.5)   | 15.9** ( $\pm$ 20.7)      |
| <i>Income</i>         |                     |                        |                    |                      |                           |
| < \$40,000            | 6.87** (2.93,12.09) | 341 (150,600)          | 0.90* (0.53,1.41)  | 49.6 ( $\pm$ 11.2)   | 20.3 ( $\pm$ 24.5)        |
| $\geq$ \$40,000       | 9.04** (4.68,14.28) | 380 (202,609)          | 1.01* (0.66,1.54)  | 51.1 ( $\pm$ 11.9)   | 16.2 ( $\pm$ 19.9)        |
| <i>Employment</i>     |                     |                        |                    |                      |                           |
| Employed <sup>3</sup> | 8.59** (4.00,14.32) | 343 (179,575)          | 0.97* (0.61,1.58)  | 49.9 ( $\pm$ 11.2)   | 16.4** ( $\pm$ 21.6)      |
| Other                 | 6.51** (2.82,11.13) | 354 (156,608)          | 0.88* (0.48,1.32)  | 50.0 ( $\pm$ 11.6)   | 21.7** ( $\pm$ 24.4)      |
| <i>Language</i>       |                     |                        |                    |                      |                           |
| Inuit <sup>4</sup>    | 5.24** (1.82,9.74)  | 337 (161,593)          | 0.79** (0.45,1.31) | 47.7** ( $\pm$ 11.6) | 24.9** ( $\pm$ 28.4)      |
| Other                 | 9.69** (5.03,17.01) | 382 (196,607)          | 1.06** (0.67,1.63) | 50.9** ( $\pm$ 12.2) | 15.0** ( $\pm$ 19.3)      |
| <i>TF consumption</i> |                     |                        |                    |                      |                           |
| Yes <sup>5</sup>      | 6.28** (2.59,11.11) | 421** (209,670)        | 0.78** (0.47,1.18) | 50.4 ( $\pm$ 11.1)   | - -                       |
| No                    | 9.15** (4.65,15.12) | 275** (112,512)        | 1.14** (0.79,1.79) | 49.2 ( $\pm$ 11.9)   | - -                       |

\*significantly different between groups, *p* < .05; \*\*significantly different between groups, *p* < .01; †significantly different between sexes, *p* < .05; ‡significantly different between sexes, *p* < .01; §Transformed nutrients presented as geometric means (interquartile ranges); <sup>1</sup>participants report educational attainment lower than secondary school completion; <sup>2</sup>participants report educational attainment as secondary school completion or higher; <sup>3</sup>full- or part-time employment at the time of survey; <sup>4</sup>predominant language spoken at home is an Inuit language or dialect; <sup>5</sup>TF = traditional food, participants report having consumed TF in the 24-hours prior to survey

Supplemental Table 4: Mean ( $\pm$ sd) and median (95% confidence intervals) values for **females** of selected diet quality indicators by socioeconomic and cultural characteristics and region of residence; *p*-values based on t-tests or Anova for differences in mean intakes and Wilcoxon tests for non-normal data.

| <i>Variable</i>       | <i>Fibre g</i>      | <i>Cholesterol mg‡</i> | <i>Na:K ratio‡</i> | <i>HEI score‡</i>    | <i>% Energy from TF‡§</i> |
|-----------------------|---------------------|------------------------|--------------------|----------------------|---------------------------|
| <i>Age (years)</i>    |                     |                        |                    |                      |                           |
| 19-30                 | 9.64** (5.23,14.21) | 244 (107,421)          | 1.22** (0.77,1.81) | 55.2 ( $\pm$ 11.6)   | 8.0** ( $\pm$ 13.6)       |
| 31-50                 | 7.86** (4.32,11.89) | 277 (131,476)          | 0.97** (0.58,1.47) | 54.0 ( $\pm$ 12.2)   | 13.5** ( $\pm$ 18.7)      |
| 51+                   | 6.43** (3.03,10.42) | 256 (123,438)          | 0.85** (0.49,1.29) | 58.4 ( $\pm$ 13.3)   | 26.6** ( $\pm$ 24.1)      |
| <i>Education</i>      |                     |                        |                    |                      |                           |
| Low <sup>1</sup>      | 6.10** (3.14,9.56)  | 252 (126,454)          | 0.92* (0.52,1.43)  | 55.2 ( $\pm$ 13.0)   | 23.2** ( $\pm$ 23.8)      |
| High <sup>2</sup>     | 8.71** (4.76,12.9)  | 261 (119,447)          | 1.03* (0.63,1.58)  | 55.6 ( $\pm$ 12.3)   | 12.1** ( $\pm$ 17.7)      |
| <i>Income</i>         |                     |                        |                    |                      |                           |
| < \$40,000            | 7.77** (4.06,12.03) | 257 (115,456)          | 0.98 (0.58,1.55)   | 55.2 ( $\pm$ 12.4)   | 14.9 ( $\pm$ 20.1)        |
| $\geq$ \$40,000       | 9.37** (5.70,13.31) | 271 (140,437)          | 1.01 (0.60,1.49)   | 56.8 ( $\pm$ 12.4)   | 13.0 ( $\pm$ 19.0)        |
| <i>Employment</i>     |                     |                        |                    |                      |                           |
| Employed <sup>3</sup> | 8.69** (4.95,12.68) | 265 (128,442)          | 1.02 (0.63,1.53)   | 55.8 ( $\pm$ 12.5)   | 12.3** ( $\pm$ 17.7)      |
| Other                 | 7.09** (3.57,11.67) | 249 (108,464)          | 1.00 (0.57,1.63)   | 54.5 ( $\pm$ 12.4)   | 17.6** ( $\pm$ 22.2)      |
| <i>Language</i>       |                     |                        |                    |                      |                           |
| Inuit <sup>4</sup>    | 6.84** (3.65,10.69) | 256 (125,468)          | 0.89** (0.53,1.29) | 55.8 ( $\pm$ 12.5)   | 20.9** ( $\pm$ 22.1)      |
| Other                 | 9.49** (5.70,13.34) | 277 (131,470)          | 1.07** (0.65,1.66) | 56.4 ( $\pm$ 12.7)   | 10.1** ( $\pm$ 16.4)      |
| <i>TF consumption</i> |                     |                        |                    |                      |                           |
| Yes <sup>5</sup>      | 7.38** (3.62,11.88) | 297 (91,403)           | 0.90** (0.53,1.32) | 56.6** ( $\pm$ 12.8) | - -                       |
| No                    | 8.74** (5.09,12.60) | 213 (150,493)          | 1.15** (0.68,1.78) | 53.9** ( $\pm$ 11.9) | - -                       |

\*significantly different between groups, *p* < .05; \*\*significantly different between groups, *p* < .01; †significantly different between sexes, *p* < .05; ‡significantly different between sexes, *p* < .01; §Transformed nutrients presented as geometric means (interquartile ranges); <sup>1</sup>participants report educational attainment lower than secondary school completion; <sup>2</sup>participants report educational attainment as secondary school completion or higher; <sup>3</sup>full- or part-time employment at the time of survey; <sup>4</sup>predominant language spoken at home is an Inuit language or dialect; <sup>5</sup>TF = traditional food, participants report having consumed traditional food in the 24-hours prior to survey
